# Supplementary material for: Potassium-sensitive poly(N-isopropylacrylamide)-based hydrogels for sensor applications
Source: Royal Society of Chemistry journal article supplement (doi:10.1039/c8py00490k), 2018-01-01
Supplement: c8py00490k1.pdf [file c8py00490k1.pdf]

## Supporting Information

### **Potassium-sensitive poly(*N*-isopropylacrylamide)-based hydrogels for sensor applications**

Dominic Büning<sup>#</sup>, Franka Ennen<sup>#</sup>, Sarah Verena Walter<sup>#</sup>, Tobias Hennecke, Mathias Ulbricht<sup>\*</sup>

Lehrstuhl für Technische Chemie II, Universität Duisburg-Essen, Universitätsstr. 7, 45141 Essen, Germany

**Table SI 1.** Overview of parameters of synthesized hydrogels

| assigned as |                               | Comonomer |        | B <sub>15</sub> C <sub>5</sub> Am content | TMC <sup>a</sup> | yield |
|-------------|-------------------------------|-----------|--------|-------------------------------------------|------------------|-------|
|             |                               |           | [mol%] | [mol%]                                    | [M]              | [%]   |
|             | M9.9M'0.1DC05                 | AAm       | 1.5    | -                                         | 0.92             | 97.2  |
|             |                               | SPE       | 0.4    | -                                         | 0.91             | 99.0  |
|             |                               | SPP       | 0.4    | -                                         | 0.91             | 97.1  |
|             | M9.85M'0.15DC05               | AAm       | 2.3    | -                                         | 0.92             | 98.1  |
|             |                               | SPE       | 0.6    | -                                         | 0.91             | 99.3  |
|             |                               | SPP       | 0.6    | -                                         | 0.91             | 98.7  |
|             | M9.8M'0.2DC05                 | AAm       | 3.0    | -                                         | 0.93             | 98.8  |
|             |                               | SPE       | 0.8    | -                                         | 0.91             | 98.7  |
|             |                               | SPP       | 0.8    | -                                         | 0.91             | 99.3  |
|             | M9.75M'0.25DC05               | AAm       | 3.8    | -                                         | 0.93             | 97.9  |
|             |                               | SPE       | 1.0    | -                                         | 0.90             | 98.6  |
|             |                               | SPP       | 0.9    | -                                         | 0.90             | 99.3  |
|             | M9.7M'0.3DC05                 | AAm       | 4.5    | -                                         | 0.93             | 98.2  |
|             |                               | SPE       | 1.2    | -                                         | 0.90             | 98.4  |
|             |                               | SPP       | 1.1    | -                                         | 0.90             | 99.1  |
|             | M9.65M'0.35DC05               | AAm       | 5.3    | -                                         | 0.93             | 99.1  |
|             | M9.6M'0.4DC05                 | AAm       | 6.0    | -                                         | 0.94             | 99.1  |
| HG1         | M9.6M'0.4DC05CE10             | AAm       | 5.8    | 3.1                                       | 0.97             | 94.3  |
|             | M9.55M'0.45DC05               | AAm       | 6.0    | -                                         | 0.93             | 98.9  |
|             | M9.5M'0.5DC05                 | AAm       | 7.5    | -                                         | 0.94             | 96.7  |
|             |                               | SPP       | 1.5    | -                                         | 0.89             | 98.9  |
|             | M9.45M'0.55DC05               | AAm       | 8.2    | -                                         | 0.94             | 98.6  |
| HG2         | M9.45M'0.55DC05CE10           | AAm       | 7.9    | 3.0                                       | 0.97             | 97.2  |
|             | M9.4M'0.6DC05                 | AAm       | 8.9    | -                                         | 0.95             | 99.0  |
|             |                               | SPP       | 2.3    | -                                         | 0.88             | 94.9  |
| HG3         | M9.4M'0.6DC05CE10             | AAm       | 8.6    | 3.0                                       | 0.98             | 97.5  |
| HG4         |                               | SPP       | 2.2    | 3.2                                       | 0.91             | 97.2  |
|             | M9.35M'0.65DC05               | AAm       | 9.6    | -                                         | 0.95             | 98.8  |
|             |                               | SPE       | 2.6    | -                                         | 0.88             | 94.9  |
| HG5         | M9.35M'0.65DC05CE10           | AAm       | 9.3    | 3.0                                       | 0.98             | 98.2  |
| HG6         |                               | SPE       | 2.6    | 3.3                                       | 0.91             | 95.0  |
|             | M9.25M'0.75DC05               | SPE       | 3.1    | -                                         | 0.88             | 97.1  |
|             |                               | SPP       | 2.9    | -                                         | 0.88             | 99.7  |
| HG7         | M9.25M'0.75DC05CE10           | SPE       | 3.0    | 3.3                                       | 0.91             | 93.7  |
| HG8         |                               | SPP       | 2.8    | 3.3                                       | 0.91             | 97.9  |
|             | M9.2M'0.8DC05                 | AAm       | 11.7   | -                                         | 0.96             | 98.2  |
| HG9         | M9.2M'0.8DC05CE10             | AAm       | 11.4   | 3.0                                       | 0.99             | 96.2  |
|             | M9M'1DC05                     | AAm       | 14.5   | -                                         | 0.97             | 98.6  |
|             |                               | SPE       | 4.1    | -                                         | 0.86             | 98.7  |
|             |                               | SPP       | 4.0    | -                                         | 0.86             | 99.2  |
| HG10        | M9M'1DC05CE10                 | AAm       | 14.1   | 3.0                                       | 1.00             | 96.8  |
| HG11        |                               | SPE       | 4.0    | 3.3                                       | 0.89             | 98.4  |
| HG12        |                               | SPP       | 3.8    | 3.3                                       | 0.89             | 97.8  |
| HG13        | M10DC05                       | -         | -      | -                                         | 0.92             | 97.1  |
| HG14        | M10DC05CE10                   | -         | -      | 3.1                                       | 0.95             | 95.9  |
|             |                               |           |        |                                           |                  |       |
| HG15        | M9M'1DC05CE10 <sup>b</sup>    | AAm       | 14.2   | 3.0                                       | 0.74             | 99.5  |
| HG16        | M7M'0.75DC05CE15 <sup>b</sup> | AAm       | 13.8   | 5.8                                       | 0.77             | 98.4  |
| HG17        | M7M'0.7DC05CE25               | AAm       | 13.3   | 9.6                                       | 0.80             | 88.6  |
| HG18        | M9M'1.2DC05CE10 <sup>b</sup>  | AAm       | 16.7   | 2.9                                       | 1.03             | 99.6  |
| HG19        | M9M'1DC05CE15 <sup>b</sup>    | AAm       | 16.9   | 4.4                                       | 1.01             | 98.7  |
| HG20        | M11.3M'1.25DC05CE12.5         | AAm       | 14.3   | 3.2                                       | 1.25             | 99.4  |
| HG21        | M11.3M'1.3DC05CE25            | AAm       | 14.2   | 6.3                                       | 1.29             | 99.4  |
| HG22        | M9M'1DC05 <sup>b</sup>        | AAm       | 14.5   | -                                         | 1.03             | 100.0 |
| HG23        | M9.1M'0.9DC05CE10             | SPP       | 3.6    | 3.3                                       | 0.90             | 98.5  |
| HG24        | M10DC05CE10                   | -         | -      | 3.1                                       | 0.95             | 98.7  |

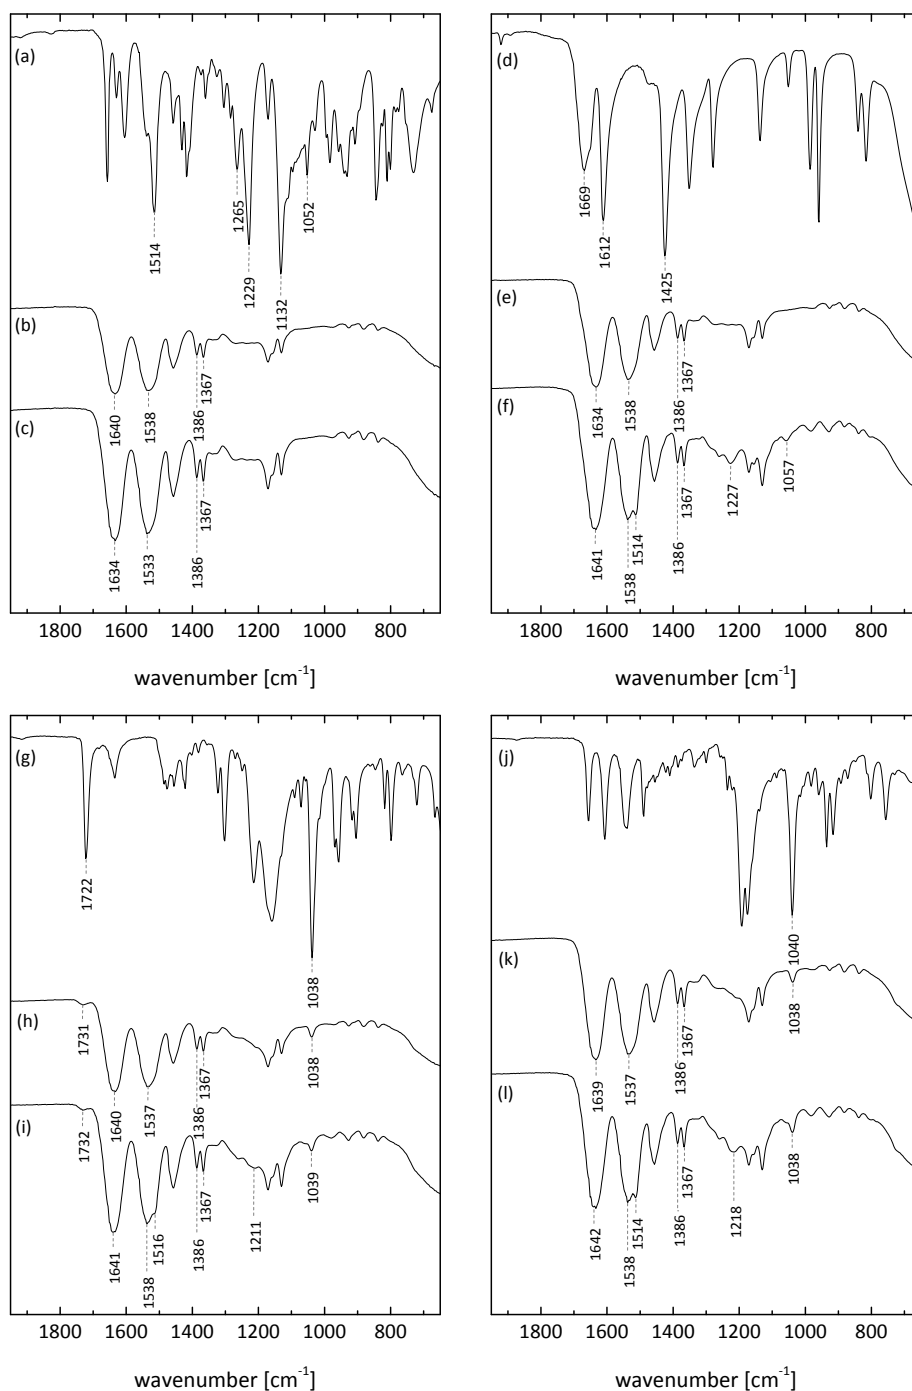

**Figure SI-1.** ATR-IR spectra of a)  $B_{15}C_5Am$ ; b) PNIPAAm hydrogel with 0 mol% BCAM; c) PNIPAAm hydrogel with 3.1 mol% BCAM; d) AAm; e) PNIPAAm hydrogel with 11.8 mol% AAm; f) PNIPAAm hydrogel 11.4 mol% AAm and 3.0 mol% BCAM; g) SPE; h) PNIPAAm hydrogel with 2.6 mol% SPE; i) PNIPAAm hydrogel with 2.6 mol% SPE and 3.3 mol% BCAM; j) SPP; k) PNIPAAm hydrogel with 2.3 mol% SPE; l) PNIPAAm hydrogel with 2.2 mol% SPE and 3.2 mol% BCAM.

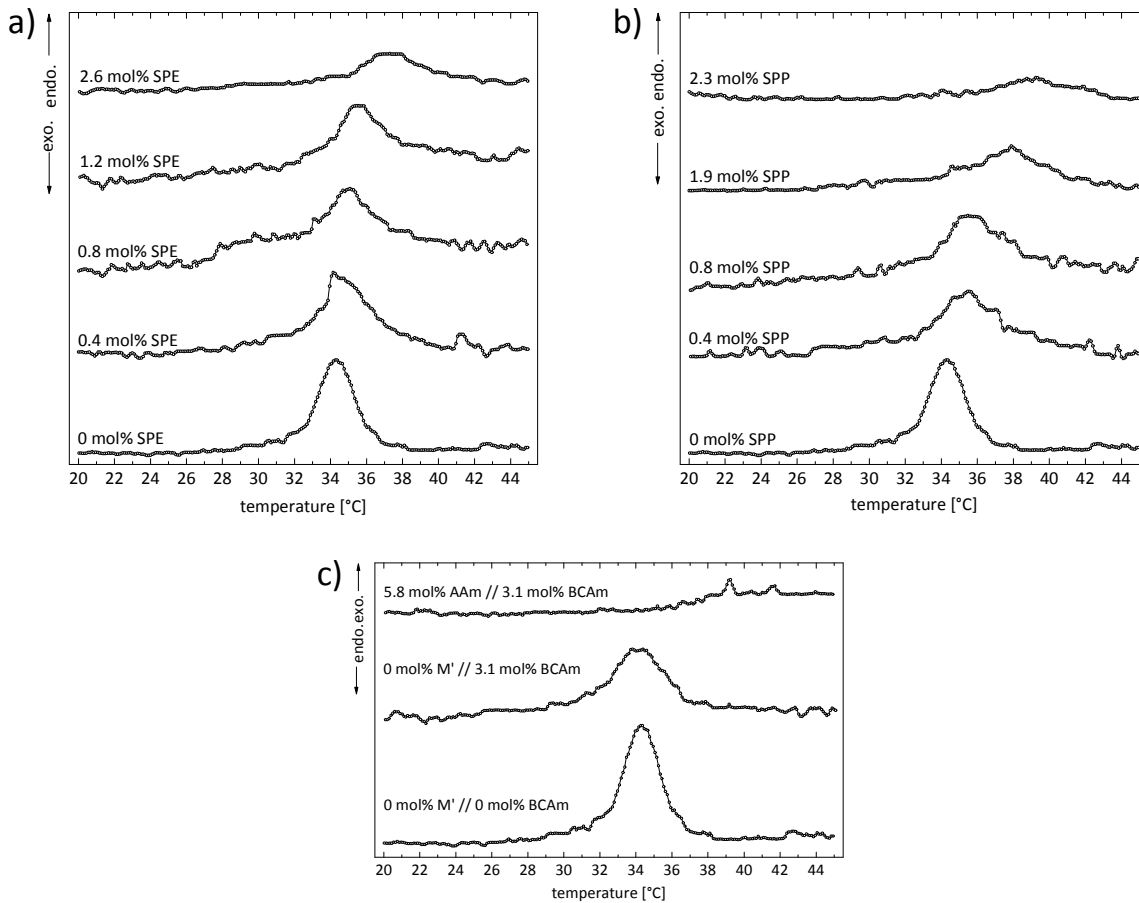

**Figure SI-2.** DSC thermograms of PNIPAAm hydrogels containing different amounts of a) SPE, b) SPP and c) BCAM and AAm.

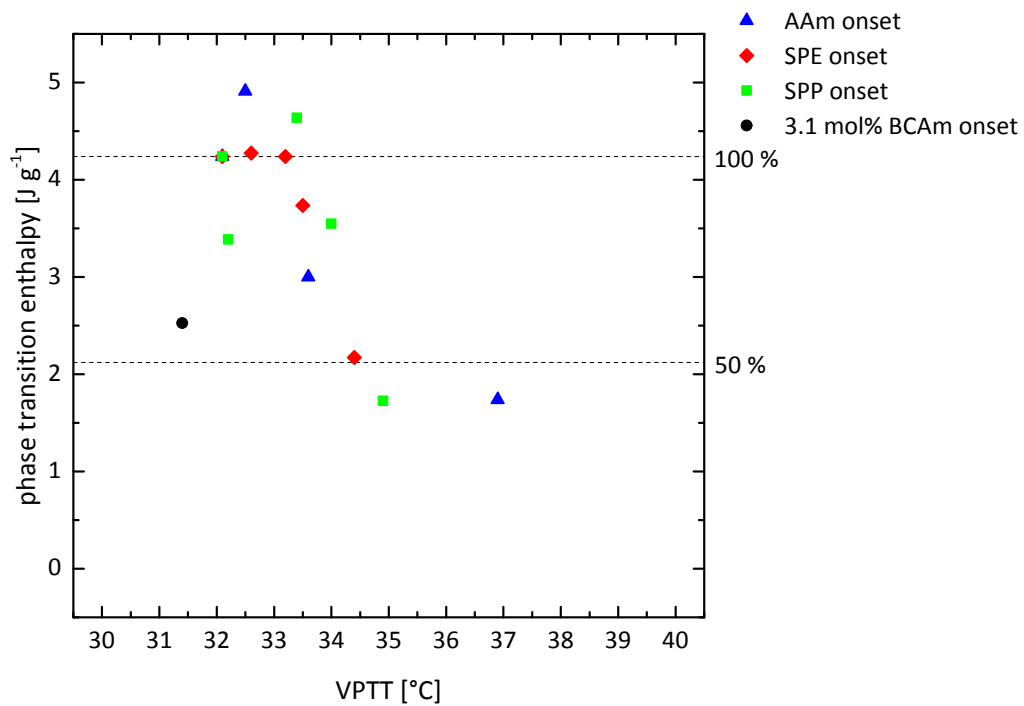

**Figure SI-3.** Dependence of phase transition enthalpy from VPTT for different hydrophilic comonomers as a measure for hydrogel performance. With respect to experimental errors AAm, SPP and SPE show similar VPT shift efficiency.

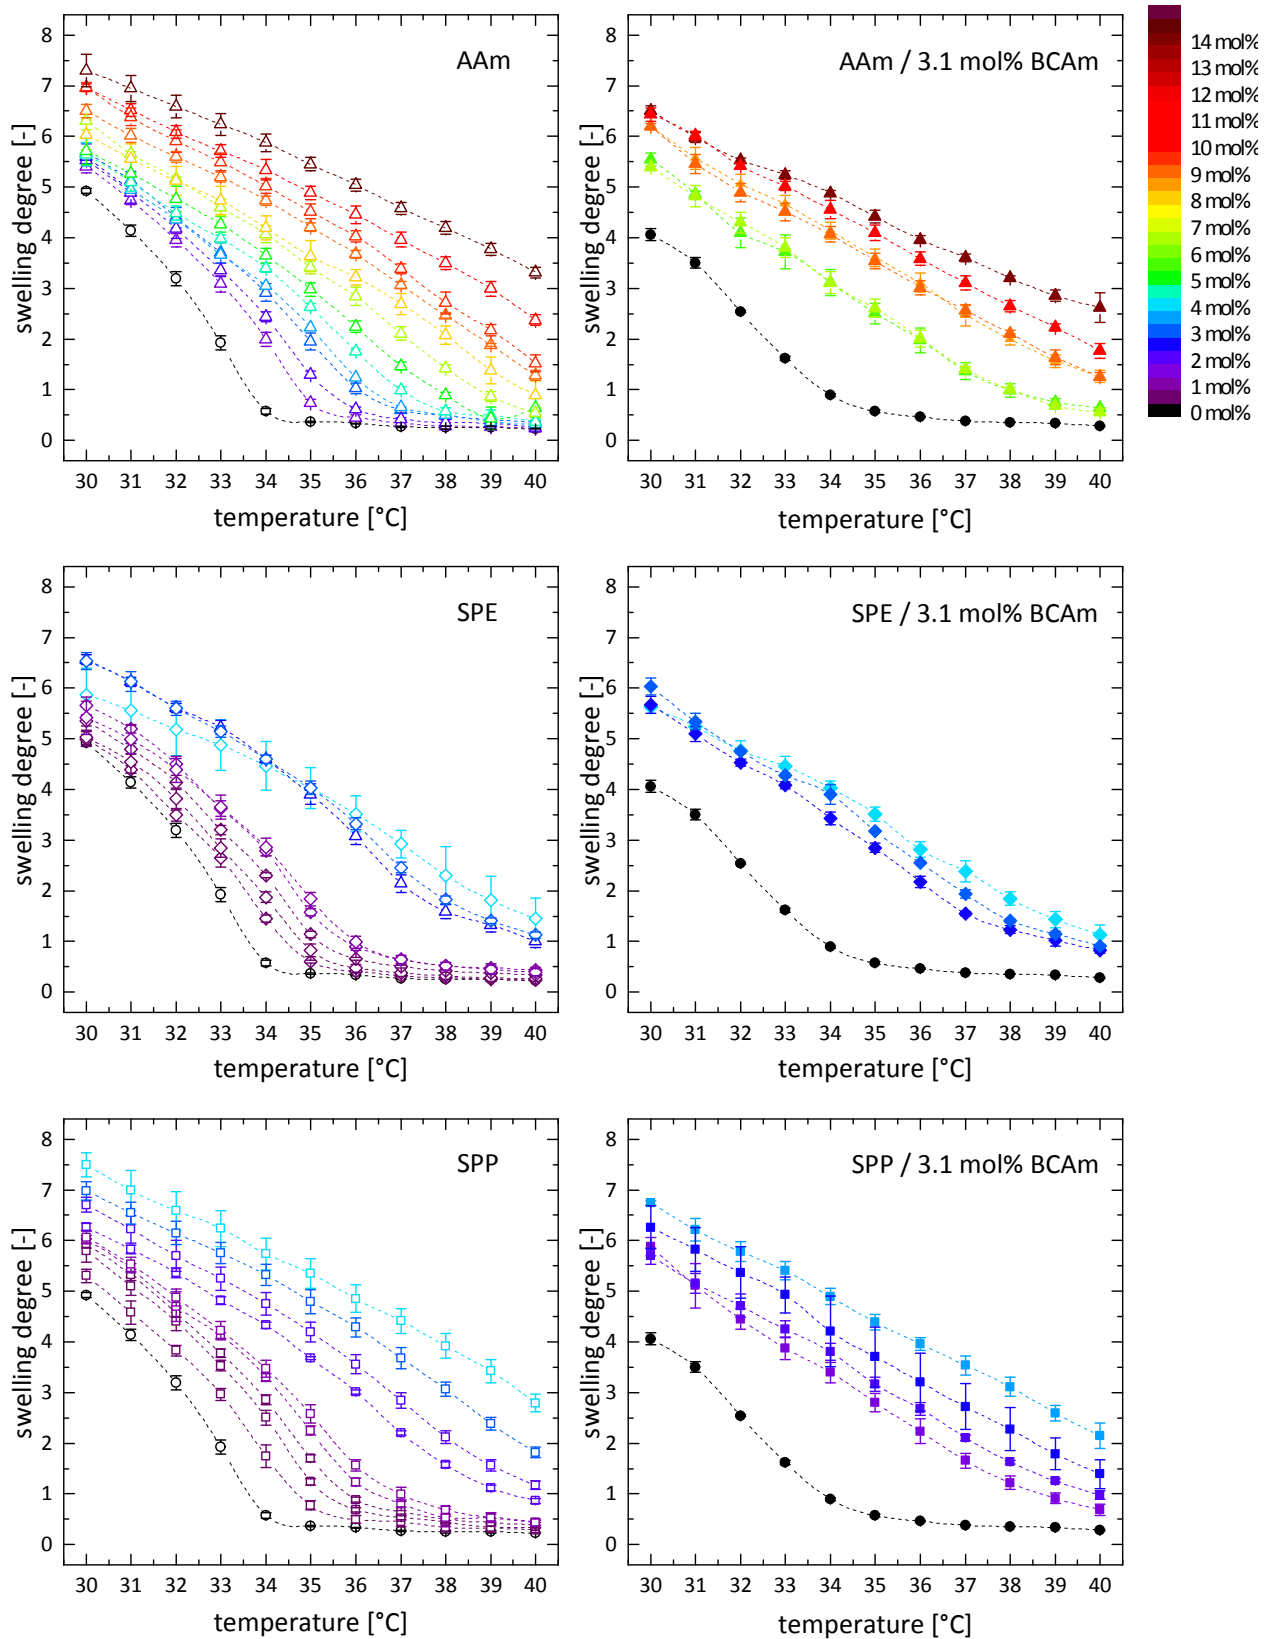

Figure SI-4. SD-T curves of various differently composed HGs.

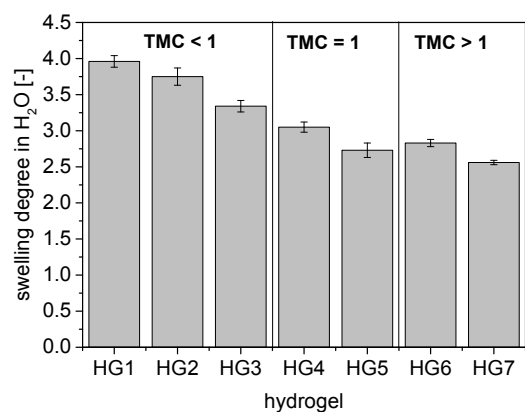

**Figure SI-5.** Swelling degrees of BCAM containing HGs in water.

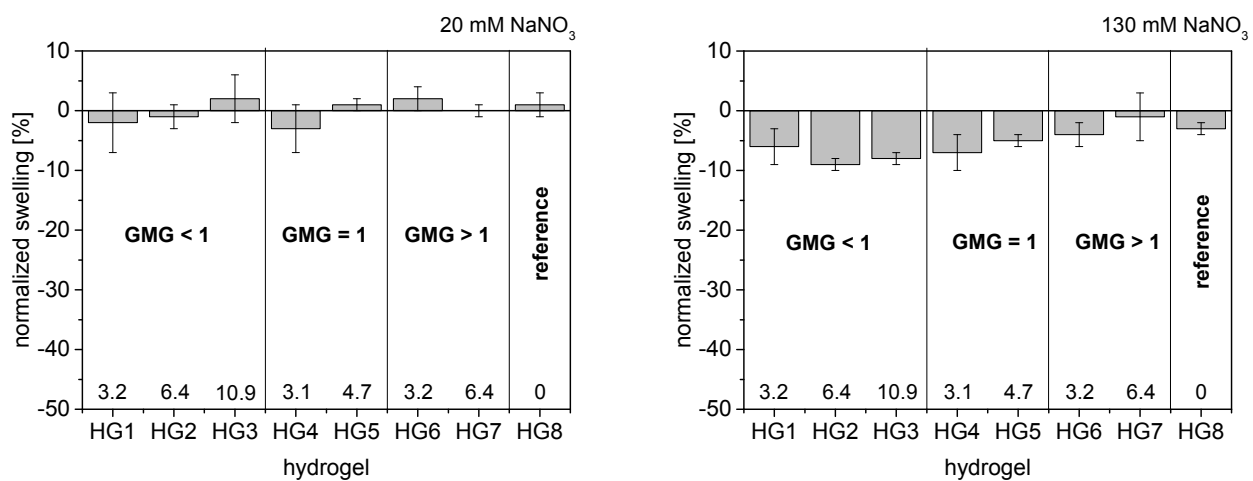

**Figure SI-6.** Normalized swelling of HGs containing different BCAM contents after equilibration in different sodium nitrate concentrations at 39° C; numbers below the columns indicate the amount of BCAM in the HG in mol%.

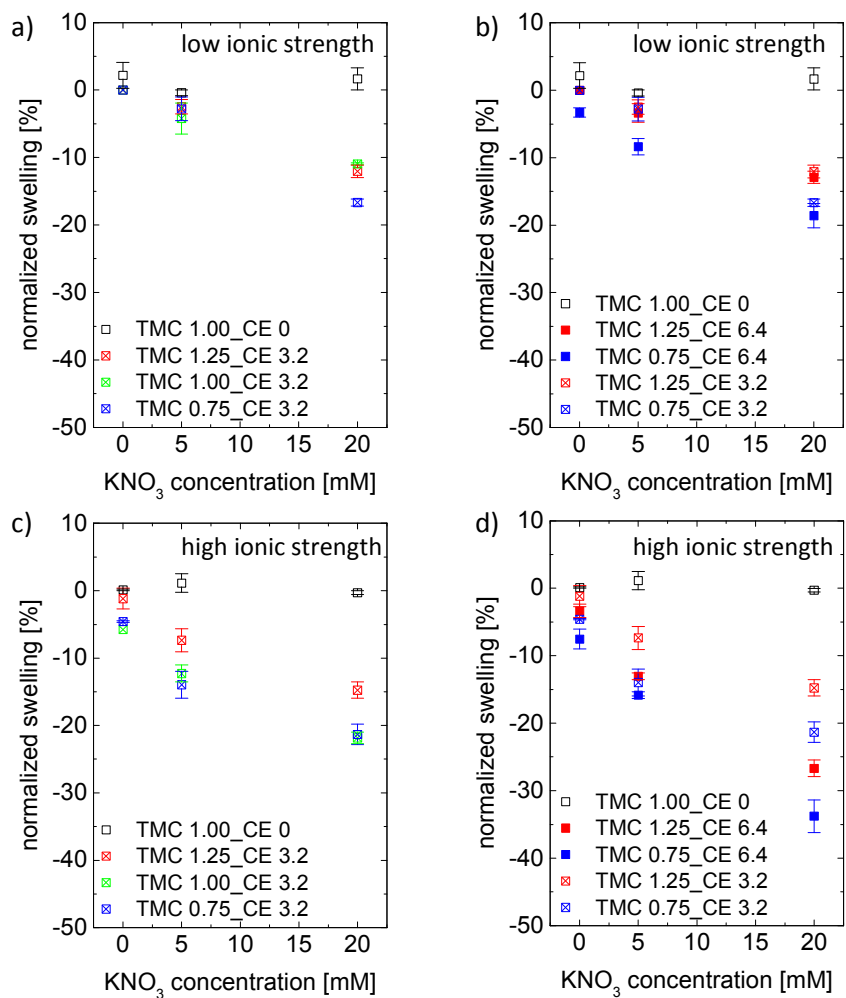

**Figure SI-7.** Normalized swelling plotted against potassium concentration, different samples with different TMC [M] and crown ether content (CE), given in mol%, are compared. A and b measured without sodium nitrate background; c and d are measured at a background of sodium nitrate, total ionic strength  $I = 130$  mM. AAm containing hydrogels were imprinted with BCAM to  $\text{KNO}_3$  ratio of 1:1.1 (except TMC 1.00\_CE 3.2, this hydrogel was only imprinted with ratio of 1.5:1).



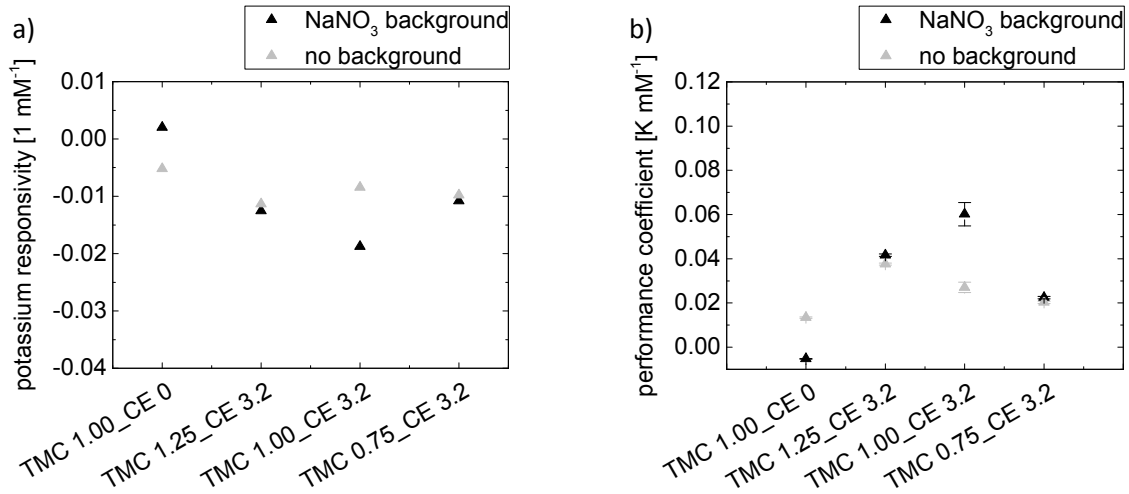

**Figure SI-8.** Left: Potassium responsivity  $K_{K^+}$  of different HGs, influence of TMC and crown ether content on potassium responsivity. Right: Performance coefficient  $K_{HG}$  calculated from tangent slope of swelling degree vs. potassium concentration (0 mM – 5 mM)  $K_{K^+}$  and tangent slope from VPT curves  $K_T$ . Both diagrams include measurements without sodium nitrate background and measurements with overall ionic strength  $I = 130$  mM due to adjustment of sodium nitrate concentration. Hydrogels were imprinted with BCAm to  $KNO_3$  ratio of 1.5:1.

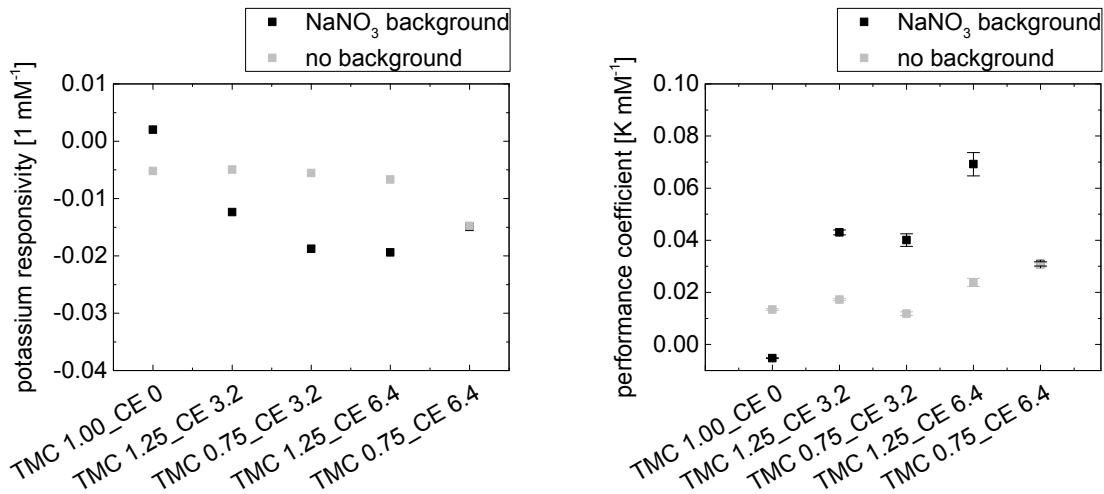

**Figure SI-9.** Left: Potassium responsivity  $K_{K^+}$  of different HGs, influence of TMC and crown ether content on potassium responsivity. Right: Performance coefficient  $K_{HG}$ . Both diagrams include measurements without sodium nitrate background and measurements with overall ionic strength  $I = 130$  mM due to adjustment of sodium nitrate concentration. Hydrogels were imprinted with BCAm to  $KNO_3$  ratio of 1:1.1.

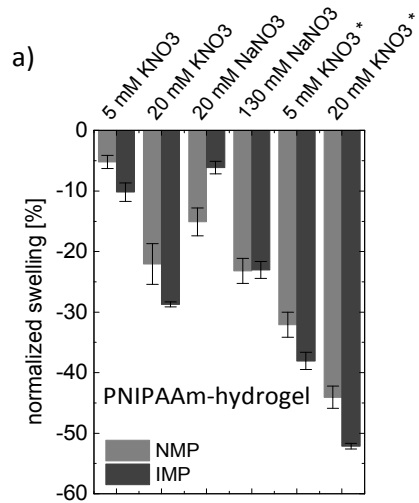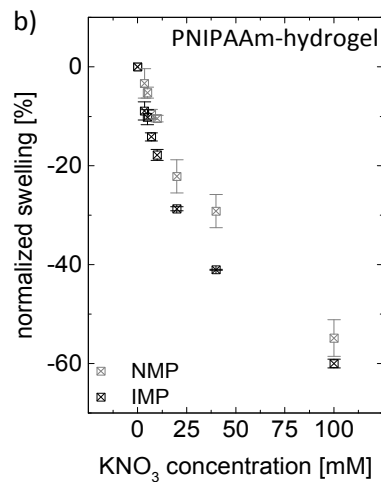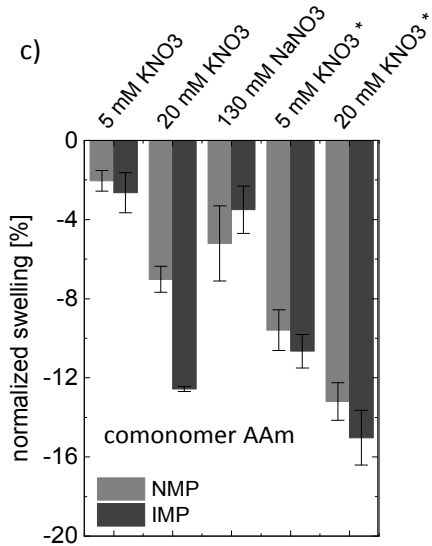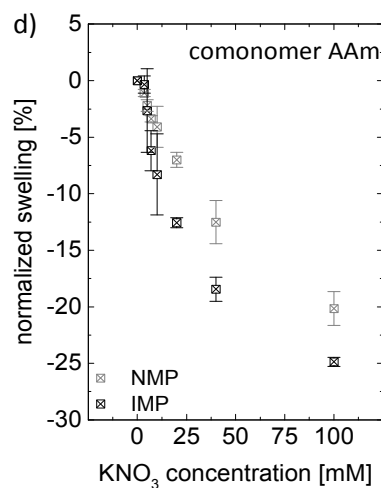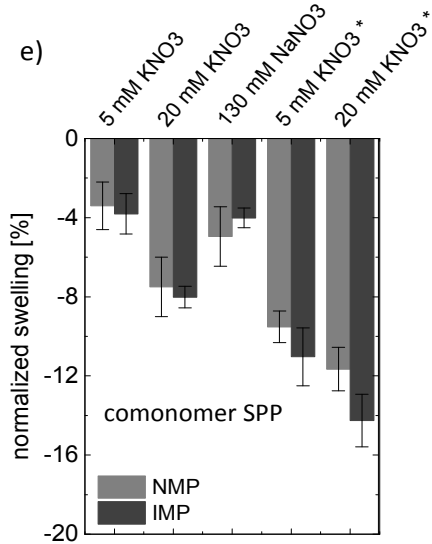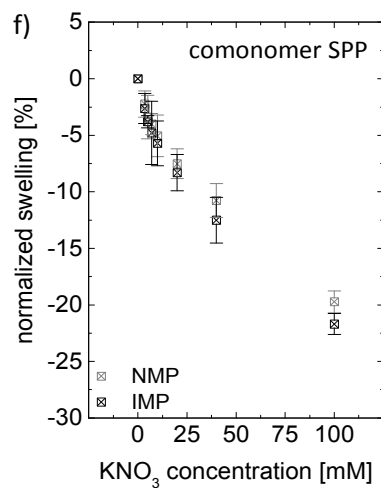

**Figure SI-10.** Normalized deswelling plotted against potassium and/or sodium nitrate concentration, thereby imprinted hydrogels (IMP) are compared with non-imprinted hydrogels (NMP); imprinting ratio of 1.5:1 BCAM to  $K^+$ .

**Figure SI-10 a) and b)** show the results of a *poly*-NIPAAm-*co*-BCAM (TMC 0.95\_CE 3.1) hydrogel analyzed at 32°C.

**Figure SI-10 c) to f)** show the effect of imprinting of comonomer containing hydrogels; all hydrogels were analyzed at a temperature of 37°C; **Figure SI-11 c) and e)** present data for a hydrogel containing 11.4 mol% AAm (TMC 0.99\_CE 3.0); **Figure SI-11 d) and f)** present data for a hydrogel containing 3.6 mol% SPP (TMC 0.90\_CE 3.3)).

In **Figure SI-10 a), c) and e)**, different salt compositions and concentrations are compared, \* highlights hydrogels analyzed in a salt solution containing both  $KNO_3$  and  $NaNO_3$  with a total ionic strength of 130 mM. In **Figure SI-10 b), d) and f)** the effect of  $KNO_3$  concentration on normalized swelling is demonstrated.
